antidiuresis. While antidiuretic hormone secretion appears to be the result of an efferent limb of a reflex arc, the afferent limb still is not clearly defined. There may be peripheral receptors responding to the elevated Pa<sub>CO<sub>2</sub></sub> or accompanying pH changes, or a direct central effect resulting in the release of ADH. Changes in Pa<sub>CO<sub>2</sub></sub> are known to affect renal blood flow and glomerular filtration directly, and possibly reflexly, via sympathetic stimulation, but our data indicate that in these studies ADH plays the dominant role.

### References

1. Gauer OH, Henry JP, Sicker HO: Cardiac receptors and fluid volume control. *Prog Cardiovasc Dis* 4:1, 1961
2. Baratz RA, Ingraham RC: Renal hemodynamics and antidiuretic hormone release associated with volume regulation. *Amer J Physiol* 198:565, 1960
3. Sladen A, Laver MB, Pontoppidan H: Pulmonary complications and water retention in prolonged mechanical ventilation. *New Eng J Med* 279:448, 1968
4. Baratz RA, Philbin DM, Patterson RW: Urinary output and plasma levels of antidiuretic hormone during intermittent positive-pressure breathing. *ANESTHESIOLOGY* 32:17, 1970
5. Verma YS, Gupta KK, Mohta S, *et al*: A study of plasma antidiuretic activity before and during intermittent positive pressure respiration in human subjects. *Indian J Med Res* 56:73, 1968
6. Yoshida S, Motohashi H, Okinaka S: Methods for the assay of antidiuretic hormone in plasma with a note on the antidiuretic titer of human plasma. *J Lab Clin Med* 62:279, 1963
7. Prys-Roberts C, Kelman GR, Greenbaum R, *et al*: Hemodynamic and alveolar-arterial P<sub>O<sub>2</sub></sub> differences at varying P<sub>aCO<sub>2</sub></sub> in anesthetized man. *J Appl Physiol* 25:80, 1968
8. Henry JP, Gauer OH, Reeves JL: Evidence of the atrial location of receptors influencing urine flow. *Circ Res* 4:85, 1956
9. Moran WII Jr, Miltenberger FW, Shuayb WA, *et al*: The relationship of antidiuretic hormone secretion to surgical stress. *Surgery* 56:99, 1964
10. Cristoforo MF, Brody MJ: Nonadrenergic vasoconstriction produced by halothane and cyclopropane anesthesia. *ANESTHESIOLOGY* 29:44, 1968
11. Price ILL: Concerning experimental results (editorial). *ANESTHESIOLOGY* 29:57, 1968
12. Barbour A, Bull GM, Evans BM, *et al*: The effect of breathing 5 to 7% carbon dioxide on urine flow and mineral excretion. *Clin Sci* 12:1, 1953
13. Valtin H, Wilson ID, Tenney SM: CO<sub>2</sub> diuresis with special reference to the role of the left atrial stretch receptor mechanism. *J Appl Physiol* 14:844, 1959

---

### Surgery

**HYPERPYREXIA** Sudden unexplained hyperpyrexia during general anesthesia is often fatal. In some instances there is associated tonic contraction of the musculature. The evidence suggests that muscle rigidity, tonic muscle contractions, and abnormal posturing are the result rather than the cause of the hyperthermia. They are common findings in heat stroke. It is essential to monitor the temperatures of patients continuously during anesthesia. (*Thomford, N. R., and others: Sudden Hyperpyrexia during General Anesthesia, Surgery* 66: 850 (Nov.) 1969.)

**HEAD INJURIES** Patients with acute hematomas ordinarily require little or no anesthesia, but an endotracheal tube must be inserted and an anesthetist must be present throughout the procedure to monitor vital functions, maintain respiratory exchange, and regulate fluid administration. For the cooperative patient with chronic subdural hematoma, local infiltration anesthesia may be adequate, but general anesthesia is necessary for the confused or anxious patient. (*Craigmile, T. K.: Operative Treatment of Acute Craniocerebral Injuries, Surg. Clin. N. Amer.* 49: 1425 (Dec.) 1969.)
